# Supplementary material for: Study of the State of Woody Plants in Arid Conditions of Mangistau (Kazakhstan)
Source: Preprints.org preprint supplement (doi:10.20944/preprints202405.0783.v1), 2024-05-13
Supplement: Supplementary file 1 [file Appendix A Physiological indicators of growth and development of trees and shrubs of the MEBG collection gene pool.xlsx]

## Sheet: 1
№	Plant names	The morphological and systematic group	Age	Transpiration intensity (mg/g)			Leaf water content (%)			Chlorophyll A content in leaves (%)			Contents of chlorophyll B in leaves (%)			Carotenoid content of leaves (%)
				June	July	August	June	July	August	June	July	August	June	July	August	June	July	August
1	Acer ginnala	Deciduous trees	7	101	80	141	7	58.3	46.6	3.48	3.66	5.5	0.52	0.56	2.3	1.09	0.81	0.89
2	Acer henryi	Deciduous trees	8	174	186	184	8	51	42.7	2.03	1.49	3.47	0.32	0.78	0.07	1.09	0.81	0.89
3	Acer laetum	Deciduous trees	8	80	605	801	8	66.1	50.3	1.55	2.52	3.31	0.03	0.33	1.25	1.07	1.47	1.37
4	Acer negundo	Deciduous trees	7	198	104	233	7	66.7	64.4	0.43	1.39	4.15	0.32	0.85	1.26	0.34	0.64	1.45
5	Acer semenovii	Deciduous trees	7	1017	157	150	7	87.1	57.1	3.64	3.29	3.6	0.46	1.51	0.82	1.65	1.06	1.25
6	Acer tataricum	Deciduous trees	7	141	220	307	7	52.8	41.1	1.26	0.95	2.68	0.37	0.2	0.76	0.78	0.7	1.35
7	Acer truncatum	Deciduous trees	7	292	215	531	7	51.8	44.8	3.18	1.41	1.62	0.24	1.31	1.36	1.43	0.52	0.82
8	Ailanthus altissima	Deciduous trees	8	104	774	97	8	60.5	65.1	4.44	4.57	4.17	1.11	1.35	1.53	1.21	1.45	1.63
9	Ammodendron bifolium	Deciduous shrubs	9	123	151	155	9	71.3	56.2	2.5	3.06	4.79	1.44	1.62	1.95	0.95	0.98	1.53
10	Amygdalus triloba	Deciduous shrubs	34	29	395	218	34	68.3	57	2.22	4	4.11	0.02	0.9	1.48	1.2	1.57	1.5
11	Armeniaca vulgaris	Fruit trees	30	67	150	162	30	65.2	60.8	0.83	1.24	0.89	0.21	0.56	0.7	0.54	0.58	0.42
12	Berberis iliensis	Deciduous shrubs	7	247	261	345	7	60	56.9	0.57	2.08	1.22	0.05	0.83	0.63	0.24	0.96	0.85
13	Berberis karkaraliensis	Deciduous shrubs	7	163	145	94	7	65.5	59.9	1.33	2.91	5.58	0.13	0.7	1.43	0.89	1.63	1.66
14	Berberis nummularia	Deciduous shrubs	17	192	208	184	17	63.4	62.5	1.06	1.2	2.6	1.3	0.19	1.68	0.39	1.07	1.12
15	Berberis thibetica	Deciduous shrubs	17	92	159	143	17	66	66.1	1.6	5.27	2.07	1.5	4.03	1.26	0.63	0.75	1.03
16	Berberis turcomanica	Deciduous shrubs	20	175	180	185	20	67.3	67.2	1.09	1.65	1.67	1.31	0.7	1.42	0.36	0.59	0.72
17	Berberis vernae	Deciduous shrubs	36	168	220	199	36	67.7	64.4	1.3	1.89	1.55	1.1	1.11	1.4	0.54	0.48	0.62
18	Berberis verruculosa	Deciduous shrubs	7	121	408	896	7	57.9	47.5	0.54	1.47	2	0.17	0.71	0.95	0.35	0.81	1.24
19	Betula pendula	Deciduous trees	7	29	263	61	7	65.3	62.3	5.55	2.87	3.76	1.89	1.36	0.84	1.66	0.98	1.34
20	Campsis radicans	Climbing plants (climbing vines)	25	167	175	164	25	64	65.6	3.93	3.5	5.02	1.96	0.8	2.39	1.48	1.64	1.45
21	Caragana aurantiaca	Deciduous shrubs	7	268	508	219	7	61.5	49.3	5.59	4.55	3.16	1.54	1.5	1.22	1.81	1.43	1.14
22	Caragana brevispina	Deciduous shrubs	7	36	165	816	7	73.4	62.3	2.58	5.34	5.26	0.08	3.53	4.1	1.18	0.96	0.72
23	Catalpa hybrida	Deciduous trees	5	31	179	109	5	66.3	67.1	4.17	1.84	2.8	0.99	1.06	0.97	1.48	0.8	1.13
24	Catalpa ovata	Deciduous trees	27	610	179	185	27	75.1	61.2	2.72	1.25	2.66	0.34	0.63	1	1.1	0.49	1.14
25	Catalpa speciosa	Deciduous trees	8	56	117	316	8	75	65.3	5.34	1.14	3.87	3.47	0.37	1.41	0.99	0.49	1.42
26	Celtis caucasica	Deciduous trees	9	213	227	342	9	52.8	88.7	0.06	3.64	1.36	0.43	0.7	0.48	0.03	1.39	0.64
27	Cercis canadensis	Deciduous trees	7	54	224	130	7	59	51.1	2.25	0.43	1.97	0.06	0.21	1.16	1.74	0.4	0.68
28	Cercis siliguastrum	Deciduous trees	7	20	129	875	7	70	56.6	0.34	0.83	3.93	0.04	0.04	1.35	0.38	0.89	1.28
29	Clematis mandschurica	Climbing plants (climbing vines)	21	168	189	162	21	72.3	77.1	1.98	2.54	3.47	1.54	0.53	2.02	0.8	1.36	1.6
30	Clematis orientalis	Climbing plants (climbing vines)	20	177	186	157	20	70.7	73.8	2.61	2.7	3.24	1.7	0.54	2.04	1.1	1.43	1.25
31	Colutea orientalis	Deciduous shrubs	7	820	132	189	7	69.9	49.5	0.81	2.34	2.11	0.19	1.67	0.31	0.66	0.64	1.08
32	Colutea x media	Deciduous shrubs	7	159	217	292	7	69.6	68	5.19	1.13	1.44	1.09	0.1	0.64	1.81	0.71	0.57
33	Cornus sanguinea	Deciduous shrubs	7	189	742	865	7	41.7	51.5	5.49	1.92	4.34	2.33	1.19	1.53	1.47	0.73	1.31
34	Corylus avellana	Deciduous shrubs	7	254	290	867	7	60.4	60	5.56	3.26	1.18	1.63	1.17	0.09	1.77	1.99	0.58
35	Cotoneaster apiculatus	Deciduous shrubs	7	81	179	511	7	52.6	45.2	4.34	5.53	2.68	0.58	1.28	1.2	1.69	1.57	0.77
36	Cotoneaster assamensis	Deciduous shrubs	7	40	111	707	7	61.5	50.1	3.05	3.73	3.24	0.6	1.61	1.09	1.42	1.8	1.32
37	Cotoneaster integerrimus	Deciduous shrubs	7	24	379	247	7	44.1	50.4	4.72	4.95	4.45	1.03	1.53	1.3	1.41	1.47	1.47
38	Cotoneaster multiflorus	Deciduous shrubs	36	164	190	186	36	53	60.4	4.25	4.98	4.38	1.87	2.2	1.8	1.35	1.44	1.3
39	Cotoneaster pekinensis	Deciduous shrubs	7	1519	164	692	7	53.3	52.8	3.11	4.49	4.13	0.4	1.94	1.37	1.87	1.65	1.49
40	Cotoneaster pseudomultiflorus	Deciduous shrubs	7	203	96	156	7	51	56.1	3.81	5.24	5.06	0.69	4.29	5.68	1.18	0.63	0.04
41	Cotoneaster sternianus	Deciduous shrubs	8	81	233	301	8	63.6	53.3	3.38	5.3	5.1	0.63	3.78	1.82	1.48	0.85	1.7
42	Cotoneaster tauricus	Deciduous shrubs	7	120	223	156	7	56.9	44.9	5.17	5.52	3.06	1.26	1.6	0.59	1.66	1.79	1.15
43	Crataegus alma-atensis	Deciduous trees	7	27	330	140	7	57.1	52.2	5.47	1.6	3.63	2.5	0.73	1.13	1.4	0.77	1.37
44	Crataegus ambigua	Deciduous trees	7	223	111	80	7	50.3	47.3	5.54	5.59	4.71	1.92	1.6	1.13	1.65	1.79	1.93
45	Crataegus calycinii	Deciduous trees	8	460	324	344	8	55.7	47	5.18	4.05	5.42	1.16	1.71	2.85	1.96	1.35	1.25
46	Crataegus chlorosarca	Deciduous trees	8	58	128	87	8	47.5	60.2	2.26	2.34	1.29	0.28	0.28	0.67	0.97	1.04	0.57
47	Crataegus collina	Deciduous trees	7	143	354	262	7	50.4	39.4	0.86	1.39	1.03	0.15	0.74	0.79	0.88	0.75	0.51
48	Crataegus combia	Deciduous trees	9	28	109	235	9	46	40.7	0.66	1.55	1.42	0.04	0.42	0.49	1.5	1.1	0.76
49	Crataegus kellermanii	Deciduous trees	7	24	208	270	7	49.5	40.1	1.09	3.95	1.3	0.37	1.34	0.2	0.72	1.25	0.85
50	Crataegus lavelleri	Deciduous trees	7	55	151	270	7	63.3	52	1.19	2.86	1.72	0.34	1.63	0.73	0.59	0.91	0.75
51	Crataegus rivularis	Deciduous trees	7	71	212	410	7	46	46.1	1.28	5.48	2.36	0.08	2.41	1.04	1.06	1.44	1.02
52	Elaeagnus oxycarpa	Deciduous trees	7	62	245	215	7	60.7	58.2	4.56	5.18	3.38	0.41	1.2	0.49	1.9	1.68	1.28
53	Elaeagnus angustifolia	Deciduous shrubs	7	333	256	208	7	68.7	63.4	5.55	5.41	5.33	1.85	2.95	3.6	1.68	1.21	0.93
54	Euonymus japonica	Deciduous shrubs	15	102	167	161	15	64.6	64.6	2.26	5.55	2.96	1.56	1.85	1.18	0.75	1.68	0.47
55	Fontanesia fortunei	Deciduous shrubs	7	176	1246	836	7	54.1	57.5	5.44	5.4	5.52	2.7	3.07	1.59	1.31	1.16	1.79
56	Forestiera neo-mexicana	Deciduous shrubs	7	77	448	584	7	62.1	62.2	2.65	1.52	0.7	3.34	0.84	0.66	0.17	0.7	0.25
57	Fraxinus acuminata	Deciduous trees	9	144	325	165	9	58.8	65	3.47	2.25	3.35	0.59	0.08	1	1.48	1.03	1.25
58	Fraxinus lanceolata	Deciduous trees	8	198	671	453	8	64.1	59.8	4.52	3.63	2.31	0.96	0.76	1.01	2.03	1.54	0.99
59	Fraxinus oxycarpa	Deciduous trees	9	278	551	273	9	73.4	59.1	3.12	3.77	5.44	0.42	0.56	2.75	1.44	1.58	1.29
60	Fraxinus rhyncophylla	Deciduous trees	7	139	310	300	7	69.6	56.1	2.72	4.19	3.55	0.4	1.8	1.35	1.81	1.67	1.46
61	Fraxinus sogdiana	Deciduous trees	9	93	116	155	9	64.5	63.3	3.35	2.78	1.88	0.39	0.6	0.76	1.52	1.43	0.79
62	Fraxinus syriaca	Deciduous trees	7	36	147	405	7	75.3	70.7	1.51	1.91	2.97	0.1	0.42	1.47	0.92	0.94	1.16
63	Gleditsia aquatica	Deciduous trees	7	68	272	381	7	54.1	62.2	1.7	1.13	1.04	0.28	0.17	0.65	0.97	0.52	0.46
64	Gleditsia texana	Deciduous trees	5	323	256	319	5	57.1	50.8	2	5.42	4.48	0.05	2.92	0.76	0.74	1.22	1.88
65	Gleditsia triacanthos	Deciduous trees	5	240	660	229	5	54.6	53.1	0.67	2.56	2.35	0.31	0.31	0.28	0.22	1.18	1.22
66	Gymnocladus dioicus	Deciduous trees	7	24	496	470	7	53.8	62.1	1.6	4.4	2.73	0.21	1.58	1.33	1.03	1.6	0.93
67	Halimodendron halodendron	Deciduous shrubs	7	59	300	412	7	63.1	50.5	3.6	1.94	3.17	0.24	0.37	1.26	1.34	0.66	0.86
68	Juglans cinerea	Deciduous trees	15	159	180	165	15	64.1	63.7	1.75	1.26	1.56	1.38	0.5	1.77	0.94	0.35	0.71
69	Juglans rupestris	Deciduous trees	7	239	606	502	7	60.3	62.5	2.22	1.06	2.48	0.25	0.34	0.83	0.93	0.59	1.08
70	Juniperus sabina	Coniferous species	23	14	196	118	67.9	57.8	63.4	2.12	1.47	0.28	0.11	0.48	0.27	1.26	0.8	0.24
71	Juniperus sargentii	Coniferous species	26	97	177	165	62.1	62.9	58.8	1.75	5.17	2.2	1.39	4.79	1.45	0.61	0.42	0.74
72	Juniperus virginiana	Coniferous species	30	59	284	210	54	68	52.6	0.8	1.54	0.22	0.02	0.65	0.32	0.01	0.7	0.21
73	Koelreuteria apiculata	Deciduous trees	37	160	219	337	37	63.8	56.8	4.29	1.11	2.3	1.18	0.95	0.76	1.52	0.62	1
74	Koelreuteria paniculata	Deciduous trees	8	48	328	891	8	57.3	40.6	2.6	3.83	4.3	0.22	1.61	1.4	1.19	1.34	1.54
75	Pinus eldarica	Coniferous species	27	118	156	142	52.3	61.6	55.4	3.59	5.34	1.62	1.94	3.49	1.37	1.07	0.98	0.41
76	Pinus pallasiana	Coniferous species	32	18	300	101	64.6	55	59.9	0.96	2.04	0.21	0.27	0.94	0.21	0.64	0.86	0.14
77	Pinus silvestris	Coniferous species	30	20	543	128	54	57.8	80.6	2.32	0.93	0.75	0.32	0.53	0.16	1.13	0.45	0.52
78	Lonicera arborea	Deciduous shrubs	36	96	413	276	36	63.5	64	2.84	5.34	5.49	0.44	3.47	2.36	1.15	0.98	1.26
79	Lonicera baltica	Deciduous shrubs	28	45	148	192	28	96.4	53.2	5.15	4.02	5.25	1.41	1.91	4.18	1.87	1.39	0.68
80	Lonicera lanata	Deciduous shrubs	31	158	164	175	31	56.3	57.4	3.93	4.89	3.46	1.86	2.23	1.17	1.2	1.39	1.26
81	Lonicera ruprechtiana	Deciduous shrubs	37	127	148	157	37	62	60.6	2.39	2.51	1.74	1.74	0.77	1.28	0.64	1.16	0.56
82	Lonicera tatarica	Deciduous shrubs	36	35	287	437	36	63.9	77	4.85	2.29	4.49	1.12	0.25	1.28	1.8	1.07	1.53
83	Maclura aurantiaca	Deciduous trees	12	103	140	294	12	64	61.6	1.35	1.34	1.76	0.01	0.05	0.6	0.87	0.78	0.85
84	Malacocarpus crithmifolius	Deciduous shrubs	6	16	186	103	6	85.2	79.9	3.87	4.2	5.47	3.98	4.12	2.53	0.78	0.26	1.39
85	Malus niedzwetzkyana	Fruit trees	42	41	156	100	42	62.5	52.8	5.52	5.52	3.94	2.12	1.56	1.22	1.56	1.78	1.23
86	Malus sieversii	Fruit trees	40	37	148	132	40	58.6	54.8	4.44	5.29	3.76	0.92	3.9	1.27	1.46	0.8	1.38
87	Mespilus germanica	Deciduous trees	7	141	238	181	7	77.7	48.8	4.15	3.84	3.48	0.67	0.82	1.3	1.7	1.29	1.47
88	Morus alba	Deciduous trees	7	96	223	474	7	57.2	58.8	3.37	5.14	5.26	0.44	1.45	4.08	1.06	1.65	0.72
89	Nitraria schoberi	Deciduous shrubs	9	45	144	156	9	75.3	86.8	2.55	5.07	4.84	0.08	5.56	1.18	1.21	0.09	1.97
90	Padus grayana	Deciduous trees	7	85	108	74	7	53.9	50.3	1.94	1.85	2.04	0.04	0.01	1.01	1.37	1.27	0.7
91	Padus serotina	Deciduous trees	7	99	318	105	7	55.1	50.5	3.15	2.04	4.12	0.11	0.04	1.74	1.52	0.99	1.71
92	Paliurus spina-cristi	Deciduous shrubs	8	269	96	78	8	62.7	56.1	5.06	3.11	3.73	0.67	0.46	1.1	2.19	1.44	1.52
93	Parthenocissus quinquefolia	Climbing plants (climbing vines)	11	163	170	159	11	63.7	69.5	2.34	2.04	3.25	1.61	0.59	1.85	0.76	0.98	1.09
94	Platanus occidentalis	Deciduous trees	7	54	115	32	7	70.8	63.7	1.41	1.24	5.47	0.32	0.23	1.68	0.76	0.79	1.75
95	Platycladus orientalis	Coniferous species	29	29	201	129	66.4	56.7	67	2.36	2.97	0.17	0.16	1.09	0.17	2.43	1.27	0.18
96	Populus alba	Deciduous trees	7	64	173	701	7	51.7	47.8	0.07	0.16	2.09	0.21	0.25	0.73	0.22	0.16	1.01
97	Populus bolleana	Deciduous trees	7	66	377	352	7	59.6	55.3	5.28	5.55	5.59	3.98	1.85	1.54	0.77	1.68	1.77
98	Populus diversifolia	Deciduous trees	40	48	292	938	40	57.8	58.4	0.09	1.56	3.62	0.25	0.1	4.59	0.13	0.74	0.06
99	Pyrus communis	Fruit trees	42	177	135	120	42	63.8	50	2.94	4.98	3.27	0.19	1.3	0.94	1.24	1.92	1.2
100	Quercus robur	Deciduous trees	7	68	123	791	7	51.1	54.4	2.05	5.37	5.47	0.4	3.28	2.52	0.85	1.07	1.39
101	Rhamnus cathartica	Deciduous shrubs	32	151	187	178	32	66	66	4.21	5.3	5.39	1.98	3.81	1.95	1.37	0.84	1.64
102	Rhamnus dolichophylla	Deciduous shrubs	34	173	203	193	34	68.2	71.7	4.81	4.38	3.4	2.03	2.03	1.33	1.49	1.61	1.16
103	Robinia pseudoacacia	Deciduous trees	5	302	586	706	5	60.3	58.3	1.57	5.54	3.35	0.28	1.62	1.2	0.9	1.74	1.08
104	Rosa arvensis	Deciduous shrubs	7	160	54	749	7	49.6	47.9	2.86	0.37	0.81	0.27	0.04	0.58	1.1	0.25	0.42
105	Rosa sicula	Deciduous shrubs	7	173	203	434	7	51.6	69	5.14	2.99	5.12	1.47	0.98	1.63	1.39	1.06	1.73
106	Rosa 'Charles De Gaulle'	Varietal roses	5	186	198	182	5	64.9	65.5	3.12	3.88	2.66	1.87	1.02	1.7	0.85	1.4	0.66
107	Rosa 'Gloria Dei'	Varietal roses	6	210	229	216	6	62.2	58.7	3.01	4.83	3.87	1.68	1.38	2.02	0.82	1.68	1.17
108	Rosa 'Medallion'	Varietal roses	6	208	210	204	6	64.9	57.4	2.91	5.08	3.03	1.82	1.48	1.75	0.8	1.67	0.77
109	Rosa 'Nicol'	Varietal roses	7	212	229	211	7	64.4	60.4	3.87	5.43	4.86	2.16	2.8	2.42	1	1.27	1.24
110	Rosa 'Tineke'	Varietal roses	4	202	197	179	4	61.7	62.4	5.42	4.5	2.49	2.34	1.69	1.55	1.45	1.45	0.66
111	Salix alba	Deciduous trees	14	173	163	151	14	70.6	63.7	2.46	2.55	3.22	1.67	0.78	1.77	0.68	1.12	0.92
112	Salix dasyclados	Deciduous trees	13	164	513	699	13	75.3	54.9	2.05	2.07	4.95	0.2	0.91	1.48	0.91	0.87	1.84
113	Sambucus canadensis	Deciduous shrubs	31	196	204	183	31	74.1	71.7	3.96	5.43	5.47	1.92	2.2	1.52	1.25	1.31	1.53
114	Sophora japonica	Deciduous trees	34	97	165	510	34	74.8	69.4	5.48	5.37	5.32	2.46	3.28	3.67	1.42	1.07	0.9
115	Sorbus aria	Deciduous trees	8	40	190	372	8	57.6	59.2	2.87	4.25	3.66	0.38	1.6	1.44	0.99	1.52	1.34
116	Sorbus torminalis	Deciduous trees	31	155	162	183	31	61	53.2	4.95	5.26	5.18	2.34	4.12	2.67	1.47	0.71	1.26
117	Symphoricarpos microphyllus	Deciduous shrubs	7	92	617	731	7	68.8	62.1	5.5	1.72	3.37	2.29	0.31	0.98	1.49	0.69	1.29
118	Syringa komarovii	Deciduous shrubs	7	70	204	162	7	69.1	52.7	4.76	4.12	4.52	1.82	1.99	1.68	1.7	1.63	1.56
119	Tamarix hohenackeri	Deciduous shrubs	9	92	183	152	9	55.4	49.9	0.33	1.83	2.36	2.7	0.5	1.03	0.1	0.74	0.85
120	Tamarix laxa	Deciduous shrubs	9	94	193	193	9	49.9	43.4	0.31	1.41	1.26	3.9	0.09	0.1	0.1	0.59	0.79
121	Tamarix meyeri	Deciduous shrubs	9	70	135	233	9	61.7	55.4	0.41	1.77	3.63	3.15	1.26	0.52	0.01	0.74	1.52
122	Tamarix ramosissima	Deciduous shrubs	9	53	98	338	9	60	55.1	0.29	0.87	1.22	3.1	0.09	0.01	0.08	0.48	0.76
123	Tilia mongolica	Deciduous trees	33	39	49	223	33	76.2	65.5	2.49	2.58	3.59	0.43	1.35	1.22	1.07	1.13	1.33
124	Tilia tomentosa	Deciduous trees	32	209	205	185	32	67.9	66.1	2.94	5.23	2.96	1.32	1.62	1.79	0.95	1.65	1.11
125	Ulmus pumila	Deciduous trees	9	58	836	112	9	59.4	65.5	4.45	5.18	5.44	0.65	1.21	2.69	1.57	1.5	1.32
126	Viburnum opulus	Deciduous shrubs	7	38	170	97	7	66.8	56.8	2.23	3.06	2.53	0.22	0.53	0.6	1.32	1.46	1.19
127	Vitis amurensis	Climbing plants (climbing vines)	24	176	190	191	24	71.8	65.4	1.5	2.04	2.51	1.37	0.4	1.71	0.49	1.17	0.95
128	Zanthoxylum simulans	Deciduous shrubs	7	53	23	295	7	61.4	40.4	1.24	3.93	5.54	0.17	1.36	1.76	0.82	1.4	1.72
