# Supplementary material for: Study of the State of Woody Plants in Arid Conditions of Mangistau (Kazakhstan)
Source: Preprints.org preprint supplement (doi:10.20944/preprints202405.0783.v1), 2024-05-13
Supplement: Supplementary file 2 [file Appendix B Sums of assessment points of biological stability for trees and shrubs of the MEBG collection gene pools.xlsx]

## Sheet: 1
Plant names	The morphological and systematic group	Drought resistance	Salt tolerance	Winter hardiness	Requirements for soil fertility	Phytophage resistance	Gas resistance	Total
		from 0 points to 15 points	from 0 points to 10 points	from 0 points to 8 points	from 0 points to 6 points	from 0 points to 6 points	from 0 points to 5 points	from 0 points to 50 points
Acer ginnala	Deciduous trees	7	5	6	3	6	3	30
Acer henryi	Deciduous trees	3	2	6	4	6	5	26
Acer laetum	Deciduous trees	3	2	6	3	6	3	23
Acer negundo	Deciduous trees	12	9	8	6	6	5	46
Acer semenovii	Deciduous trees	7	10	8	6	6	5	42
Acer tataricum	Deciduous trees	7	5	6	6	6	3	33
Acer truncatum	Deciduous trees	3	2	6	6	6	3	26
Ailanthus altissima	Deciduous trees	12	9	8	6	6	5	46
Ammodendron bifolium	Deciduous shrubs	12	7	6	6	6	5	42
Amygdalus triloba	Deciduous shrubs	7	5	6	3	6	3	30
Armeniaca vulgaris	Fruit trees	12	7	6	3	3	3	34
Berberis iliensis	Deciduous shrubs	7	5	6	3	6	3	30
Berberis karkaraliensis	Deciduous shrubs	7	9	6	3	6	3	34
Berberis nummularia	Deciduous shrubs	7	7	3	3	3	1	24
Berberis thibetica	Deciduous shrubs	6	4	2	6	3	1	22
Berberis turcomanica	Deciduous shrubs	12	7	8	3	6	3	39
Berberis vernae	Deciduous shrubs	7	5	3	3	3	3	24
Berberis verruculosa	Deciduous shrubs	7	2	6	4	6	3	28
Betula pendula	Deciduous trees	3	5	8	6	6	3	31
Campsis radicans	Climbing plants (climbing vines)	12	5	8	3	6	3	37
Caragana aurantiaca	Deciduous shrubs	12	7	8	3	1	3	34
Caragana brevispina	Deciduous shrubs	7	5	8	4	1	3	28
Catalpa hybrida	Deciduous trees	7	5	6	2	3	3	26
Catalpa ovata	Deciduous trees	3	5	6	2	6	3	25
Catalpa speciosa	Deciduous trees	7	7	6	3	6	3	32
Celtis caucasica	Deciduous trees	7	5	6	3	6	3	30
Cercis canadensis	Deciduous trees	12	5	6	3	3	3	32
Cercis siliguastrum	Deciduous trees	7	5	6	3	6	3	30
Clematis mandschurica	Climbing plants (climbing vines)	7	5	8	6	6	3	35
Clematis orientalis	Climbing plants (climbing vines)	15	5	8	6	6	3	43
Colutea orientalis	Deciduous shrubs	7	2	3	4	1	1	18
Colutea x media	Deciduous shrubs	12	5	6	6	1	1	31
Cornus sanguinea	Deciduous shrubs	3	2	1	3	3	3	15
Corylus avellana	Deciduous shrubs	3	2	8	0	3	1	17
Cotoneaster apiculatus	Deciduous shrubs	7	5	6	6	6	3	33
Cotoneaster assamensis	Deciduous shrubs	7	5	6	6	6	3	33
Cotoneaster integerrimus	Deciduous shrubs	12	5	6	4	6	3	36
Cotoneaster multiflorus	Deciduous shrubs	7	5	8	6	3	3	32
Cotoneaster pekinensis	Deciduous shrubs	12	7	6	6	6	3	40
Cotoneaster pseudomultiflorus	Deciduous shrubs	12	7	6	6	6	3	40
Cotoneaster sternianus	Deciduous shrubs	7	2	3	3	3	3	21
Cotoneaster tauricus	Deciduous shrubs	12	5	3	6	6	5	37
Crataegus alma-atensis	Deciduous trees	7	9	8	3	6	3	36
Crataegus ambigua	Deciduous trees	15	5	8	6	6	3	43
Crataegus calycinii	Deciduous trees	7	5	6	3	6	3	30
Crataegus chlorosarca	Deciduous trees	7	9	8	3	3	3	33
Crataegus collina	Deciduous trees	7	5	8	3	3	5	31
Crataegus combia	Deciduous trees	7	2	3	4	3	1	20
Crataegus kellermanii	Deciduous trees	7	5	8	3	6	5	34
Crataegus lavelleri	Deciduous trees	7	5	6	3	3	5	29
Crataegus rivularis	Deciduous trees	7	2	6	3	3	3	24
Elaeagnus oxycarpa	Deciduous trees	15	9	8	6	3	3	44
Elaeagnus angustifolia	Deciduous shrubs	12	9	6	6	6	5	44
Euonymus japonica	Deciduous shrubs	12	5	3	3	6	3	32
Fontanesia fortunei	Deciduous shrubs	7	5	3	3	6	5	29
Forestiera neo-mexicana	Deciduous shrubs	7	5	6	3	6	5	32
Fraxinus acuminata	Deciduous trees	7	5	8	3	6	5	34
Fraxinus lanceolata	Deciduous trees	12	7	8	6	6	3	42
Fraxinus oxycarpa	Deciduous trees	12	7	3	6	6	5	39
Fraxinus rhyncophylla	Deciduous trees	3	5	6	3	3	5	25
Fraxinus sogdiana	Deciduous trees	12	5	8	3	6	5	39
Fraxinus syriaca	Deciduous trees	7	5	8	6	6	3	35
Gleditsia aquatica	Deciduous trees	7	5	6	3	6	3	30
Gleditsia texana	Deciduous trees	12	7	8	3	6	3	39
Gleditsia triacanthos	Deciduous trees	12	7	8	6	6	5	44
Gymnocladus dioicus	Deciduous trees	7	5	6	3	3	3	27
Halimodendron halodendron	Deciduous shrubs	12	7	6	3	3	3	34
Juglans cinerea	Deciduous trees	7	5	6	3	3	3	27
Juglans rupestris	Deciduous trees	3	5	6	2	3	3	22
Juniperus sabina	Coniferous species	12	5	8	6	3	3	37
Juniperus sargentii	Coniferous species	12	5	6	6	6	3	38
Juniperus virginiana	Coniferous species	12	5	8	6	0	3	34
Koelreuteria apiculata	Deciduous trees	7	5	6	3	6	5	32
Koelreuteria paniculata	Deciduous trees	7	7	8	3	6	3	34
Pinus eldarica	Coniferous species	12	5	1	2	0	5	25
Pinus pallasiana	Coniferous species	7	5	8	3	6	3	32
Pinus silvestris	Coniferous species	7	5	8	3	6	3	32
Lonicera arborea	Deciduous shrubs	12	5	6	3	6	3	35
Lonicera baltica	Deciduous shrubs	7	5	6	3	3	3	27
Lonicera lanata	Deciduous shrubs	7	0	3	6	3	3	22
Lonicera ruprechtiana	Deciduous shrubs	7	5	3	3	3	3	24
Lonicera tatarica	Deciduous shrubs	12	5	6	3	6	3	35
Maclura aurantiaca	Deciduous trees	12	7	8	6	6	3	42
Malacocarpus crithmifolius	Deciduous shrubs	15	10	6	6	6	5	48
Malus niedzwetzkyana	Fruit trees	7	5	6	3	3	3	27
Malus sieversii	Fruit trees	7	5	6	6	3	3	30
Mespilus germanica	Deciduous trees	12	5	3	3	3	3	29
Morus alba	Deciduous trees	7	10	8	6	6	5	42
Nitraria schoberi	Deciduous shrubs	12	10	8	6	3	3	42
Padus grayana	Deciduous trees	0	2	6	2	3	3	16
Padus serotina	Deciduous trees	0	2	6	2	1	3	14
Paliurus spina-cristi	Deciduous shrubs	7	5	6	4	3	3	28
Parthenocissus quinquefolia	Climbing plants (climbing vines)	12	5	8	6	6	5	42
Platanus occidentalis	Deciduous trees	7	5	6	2	3	3	26
Platycladus orientalis	Coniferous species	12	7	8	6	6	3	42
Populus alba	Deciduous trees	7	5	6	3	3	3	27
Populus bolleana	Deciduous trees	12	9	6	6	3	3	39
Populus diversifolia	Deciduous trees	15	7	8	6	3	5	44
Pyrus communis	Fruit trees	7	5	6	3	3	3	27
Quercus robur	Deciduous trees	7	0	8	6	6	5	32
Rhamnus cathartica	Deciduous shrubs	7	5	6	6	6	3	33
Rhamnus dolichophylla	Deciduous shrubs	7	5	3	3	3	3	24
Robinia pseudoacacia	Deciduous trees	12	9	8	3	1	3	36
Rosa arvensis	Deciduous shrubs	7	5	3	3	6	3	27
Rosa sicula	Deciduous shrubs	12	7	3	3	6	3	34
Rosa 'Charles De Gaulle'	Varietal roses	7	5	3	3	3	3	24
Rosa 'Gloria Dei'	Varietal roses	12	5	6	6	6	3	38
Rosa 'Medallion'	Varietal roses	7	5	3	2	3	3	23
Rosa 'Nicol'	Varietal roses	7	7	3	2	3	3	25
Rosa 'Tineke'	Varietal roses	12	5	6	6	6	3	38
Salix alba	Deciduous trees	12	5	6	6	1	3	33
Salix dasyclados	Deciduous trees	3	5	3	3	1	3	18
Sambucus canadensis	Deciduous shrubs	7	5	3	3	3	3	24
Sophora japonica	Deciduous trees	7	9	8	3	6	5	38
Sorbus aria	Deciduous trees	3	2	6	2	1	3	17
Sorbus torminalis	Deciduous trees	7	5	6	3	3	3	27
Symphoricarpos microphyllus	Deciduous shrubs	7	5	6	3	6	3	30
Syringa komarovii	Deciduous shrubs	7	5	3	3	3	3	24
Tamarix hohenackeri	Deciduous shrubs	15	9	8	6	3	3	44
Tamarix laxa	Deciduous shrubs	15	10	6	6	6	5	48
Tamarix meyeri	Deciduous shrubs	12	10	8	6	3	3	42
Tamarix ramosissima	Deciduous shrubs	15	10	6	6	3	3	43
Tilia mongolica	Deciduous trees	3	5	3	2	3	3	19
Tilia tomentosa	Deciduous trees	5	5	3	3	3	3	22
Ulmus pumila	Deciduous trees	15	7	8	6	1	5	42
Viburnum opulus	Deciduous shrubs	3	2	6	2	6	1	20
Vitis amurensis	Climbing plants (climbing vines)	12	5	8	3	6	5	39
Zanthoxylum simulans	Deciduous shrubs	7	2	6	4	6	3	28
